# Supplementary material for: Brief communication: Influence of snow cover on albedo reduction by snow algae
Source: Copernicus journal article supplement (doi:10.5194/egusphere-2023-2379), 2023-10-27
Supplement: Supplementary file 1 [file egusphere-2023-2379-supplement.pdf]

| Sample | Volume (mL) | Cells ml <sup>-1</sup> | Chl-a (mg mL <sup>-1</sup> ) |
|--------|-------------|------------------------|------------------------------|
| 1      | 66.4        | 35000                  | 5.9                          |
| 2      | 66.7        | 45000                  | 10.4                         |
| 3      | 70.7        | 87000                  | 9.5                          |
| 4      | 67.2        | 35000                  | 2.7                          |
| 5      | 74.4        | 56000                  | 3.2                          |
| 6      | 77.2        | 210500                 | 24.3                         |

Table S1. Measurements of sample volume and biomass of snow algae.
