# Supplementary material for: Brief communication: Influence of snow cover on albedo reduction by snow algae
Source: Copernicus journal article supplement (doi:10.5194/egusphere-2023-2379), 2023-10-27
Supplement: Supplementary file [file egusphere-2023-2379-RC2-supplement.pdf]

## Summary of comments on “Brief communication: Influence of snow cover on albedo reduction by snow algae”

### General comments:

A neat, compact study on a pressing subject with clear ramifications to the quantification of BAR from snow algae.

My main query revolves around the use of “% albedo increase” as the reporting unit. I am not totally familiar with spectral and albedo research, however I think this has the potential to confuse the discussion, and to misrepresent some relationships (e.g. albedo vs snow depth). Perhaps it would be worthwhile to replot the data against a relative albedo value instead (either relative to a control panel measurement, or a snow control measurement)?

I am also unsure about the plots and linear regression approaches in figure 3B. The figure legends and labelling of points was fairly unclear. The values for 0 cm snow depth appear to be missing from plot 3 B, and the corresponding regression analysis. I am also not sure linear regression values are useful on values from sequential experimental results like those in the cell density plot, or values that have not been normalised to cell density.

The results are impactful with wide ranging implications for snow algae research, including remote sensing approaches, quantification of BAR, and ecology. That there are implications from the work is pointed out in in the text, but it would great to see these implications explored further in the results and discussion.

### Comments in text (line number indicated):

- 32 - More no? See Hotaling review table in below ref.
- 33 - More so than ice algae?
- 38 - There is much greater diversity than this. Perhaps rephrase along the lines of "dominant taxa observed in snow algae bloom formation". As a US counter example see Van Hees et al. 2023 on Chlainomonas spp. blooms
- 38 - Orange blooms are common in the Antarctic (Remias et al 2013)
- 43 - Maybe find a primary reference showing cell abundance vs IRF/melt?
- 46 - rephrase sentence
- 92 - Personally Ive observed snow algae in dense layers much deeper than 2 cm (5-15 cm). Whether these blooms were actively growing is beside the point to this study which is assessing impact on reflectance, not biology. I would have perhaps tested to deeper snow depths.
- 95 - My understanding of albedo and spectral data is limited, however would it not be better to measure the reduction in albedo from a set standard (a control panel? or the control snow patch?) ? I am unsure about the wording of albedo "increasing" in this way, even if the increase is a proportional increase (%). Ive commented below, more specifically on the results, too.
- 98 - was the PVC tube used for the reference as well?
- 100 - I think assuming generally consistent snow structure across your study snow patch and samples is reasonable. However it would be useful to report some of those characteristics (grain size, density) for future comparison with other sites/snow packs. My understanding of spectral/snow physics are poor, but I assume that the snow structure will make a significant difference to how much snow cover affects BAR?
- 108 - Any evidence of subsurface cells? What was the depth of the observed bloom?
- 118 - was the composition of cells/species consistent across the 6 measurement plots?

- 137 - those?
- 138 - not sure the last section of this sentence adds to the discussion. Too many variables to make such statements.
- 171 - was there a difference in the effect of snow depth on reflectance in different absorption ranges? Does green and red absorption get reduced at the same rate with snow depth increase? Would be interesting to discuss
- 176 - see comment above, and on Figure 3B
- 179 - so absorption in these wavelengths is potentially affected more by snow cover? Worth discussing?
- 180 - See comments on figure 3B - the cell density plot is not all that clear, but is it suggesting that snow cover has a greater effect on higher biomass blooms? Again, i think using "increase in albedo" maybe confuses this point. Plotting relative albedo vs cell density instead might show the relationship more clearly? And more intuitively show that high cell count results in lower albedo, and that the increase in reflectance with snow cover is steeper for high biomass blooms (which i think your figure 2 plot 6 shows as well)?
- 183 - See comments on graph, but could you not normalise for cell density before performing linear regression between reflectance and snow depth? This is conflating two factors (cell density and snow depth) on reflectance. As discussed in comments above, that cell density interacts with the effect on albedo is interesting in itself, and could be explored, but not sure this linear regression is the best way to do so.
- 191 - indicate is a bit strong. perhaps "suggest". Unless you can include melt data or calculations?
- 198 - Agree in general with this, and a crucial data point in calculating IRF across regions from remote sensing methods. But also agree with previous reviewer - your data suggests spectral approaches might well detect some chlorophyll absorption through shallow snow cover! Maybe worth expanding this comment/discussion?
- 203 - Was this shown in this analysis? Any evidence for this?
- 206 - Just suggestions, but could the ramifications of this study be explored further?
  - could this understanding help constrain the boundaries of detection of covered snow algae? or allow more refined detection of subsurface blooms?
  - what is the relative impact of snow cover on BAR at a landscape scale? do covered snow algae blooms contribute a missed proportion of BAR using current methods? If so is that missed proportion significant? A rough back of the envelope simulation/model of a bloom/snowfield might be interesting to test this?
  - any ecological significance? green vs red snow blooms? PS efficiency at depth vs surface?
- 213 - Maybe needs rephrasing - the findings suggest subsurface snow habitats might still be suitable for PS activity in snow algae, facilitated by absorption and localised melting effects
- 216 - could these be explored?
- Fig 1D - Any scale?
- Fig 3B - should this not be normalised for cell counts? weak correlation is due to the variation in cell count, not the weak relationship between snow depth and reflectance
- Fig 3B - Is this showing that reflectance increases more steeply when you have a higher biomass? The cell count plots and figure legend are very unclear - are the points spectral measurement replicates? Again, perhaps worth trying to plot these using relative albedo (vs a control value), rather than increase in absorption? Also, similarly to plots next door, is an r2 value appropriate if you are plotting points from the same plot at different snow depths?
- Fig 3B - Should the values for 0 cm snow cover not be included? And the regression not extend to this? This seems to me to be of central importance to the study, as

reflectance seems to increase more steeply between 0 cm and 0.5 cm depth? Though again, may be an artefact of using "% increase in albedo"

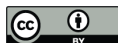

1 TITLE

2 Brief communication: Influence of snow cover on albedo reduction by snow  
3 algae

4 AUTHORS

5 Pablo Almela<sup>1</sup>, James J. Elser<sup>2</sup>, J. Joseph Giersch<sup>2</sup>, Scott Hotaling<sup>3</sup> and Trinity L.  
6 Hamilton<sup>1\*</sup>

7 (1) Department of Plant and Microbial Biology, University of Minnesota, St. Paul, MN  
8 55108, USA

9 (2) Flathead Lake Biological Station, University of Montana, Polson, MT 59860, USA

10 (3) Department of Watershed Sciences, Utah State University, Logan, UT 84322, USA

11 Correspondence to: Trinity L. Hamilton ([trinityh@umn.edu](mailto:trinityh@umn.edu))

12

13 ABSTRACT

14 Snow algae contribute to snowmelt by darkening the surface, reducing its albedo.  
15 However, the potential consequences of algae under the surface (such as after a fresh  
16 snowfall) on albedo reduction is not known. In this study, we examined the impact of  
17 sub-surface snow algae on surface energy absorption. The results indicate energy  
18 absorption across all analysed wavelength ranges when snow algae are snow-covered,  
19 an effect that was correlated with both cell densities and chlorophyll-a concentrations.  
20 These findings suggest that snow algae lower albedo and thus increase snow melt  
21 even when snow-covered.

22

23 INTRODUCTION

24 Snow is the most reflective of natural surfaces on Earth, reflecting >90 % of visible  
25 radiation when freshly fallen (Skiles et al., 2018). The primary determinant of snow's  
26 albedo is its physical composition, primarily due to scattering at the interface between  
27 ice and air (Cook et al., 2017). However, the introduction of impurities reduces snow  
28 reflectance and enhances its absorption of solar energy. These impurities or  
29 contaminants can be abiotic (e.g., dust) and biotic (e.g., algae). The effects of  
30 biological albedo reduction (BAR)—the collective influence of biological communities  
31 on albedo—are receiving increasing attention. Indeed, snow algae can reduce the  
32 albedo of the snow by around 20 % (Hotaling et al., 2014; Ganey et al., 2017; Khan et al.,  
33 2021), likely making blooms of snow algae the largest global contributor to BAR  
34 (Hotaling et al., 2021).

35 Snow algae blooms are common during summer in alpine and polar ecosystems when  
36 there is sufficient interstitial water to provide necessary habitat. Algae involved in this  
37 phenomenon are represented by genera *Chlamydomonas*, *Chloromonas*, and  
38 *Sanguina* (Hotaling et al., 2021) and color the snow red due to production of the  
39 carotenoid, saxanthin (Remias et al., 2005). The production of this pigment protects



40 the cell against high UV radiation and allows it to gain heat through the absorption of  
41 visible light, melting the surrounding ice crystals to access nutrients and grow (Dial et  
42 al., 2018). Consequently, snow algae increase rates of melting when they increase in  
43 abundance (Hoban and Remias, 2020).

44 Snow algae predominantly bloom on the surface of melting snow, although can  
45 manifest below the surface (Skiles et al., 2018). The vertical distribution of snow algae  
46 within snowpack likely is an important factor in determining their impact on albedo.  
47 However, research that links snow algae to changes in albedo typically focuses on  
48 visible surface blooms (e.g., Ganey et al., 2017; Healy and Khan, 2023). Thus, the  
49 effects on BAR when snow algae are found beneath the surface have not been  
50 quantified.

51 In this study, we investigated the effects of subsurface snow algae on albedo. We  
52 measured the spectral albedo at different cell densities present in the same snow  
53 patch. To examine the impact of a snow cover on snow algae, we applied successive  
54 layers of clean snow from a nearby area and measured spectral albedo for increasing  
55 depths of overlying clean snow. Following this, we collected the biomass for analysis,  
56 measuring cell densities and chlorophyll-a concentrations. With these data we seek to  
57 advance our understanding of the effects of snow algae in alpine environments, where  
58 glaciers and snowfields are critical components of the water supply and are particularly  
59 susceptible to climate change.

60

## 61 METHODS

### 62 *Study Site*

63 Glacier National Park (GNP), referred as *Ya-qawiswixuki* ("the place where there is a  
64 lot of ice") by the Kootenai tribe, is located in northwest Montana, United States. The  
65 park preserves one of the most ecologically intact temperate regions of the world.  
66 During the Little Ice Age, an estimated 146 glaciers were within the current boundaries  
67 of GNP. By 2005, only 51 of these glaciers persisted (Martin-Mikle and Fagre, 2019).

68 The experiment was conducted on a seasonal snowfield located at the northeast base  
69 of Clements Mountain (48°41'33" N 113°44'10" W) at Logan Pass. The snowfield,  
70 approximately 0.6 km<sup>2</sup>, had a slope of 20-22° and a snow depth ranging from 50-125  
71 cm. Snow algae could be clearly seen in the distance (~100 m). To control for variation  
72 in the presence of snow algae and other factors, we replicated our experiment across  
73 six plots, spaced at least 2 m apart from one another.

74

### 75 *Measurements of spectral reflectance*

76 On 1 August 2023, spectral reflectance of the six study plots was measured using an  
77 ASD FieldSpec 4 spectroradiometer (Malvern Panalytical, UK) and a pistol grip device  
78 that allows a directional measurement with a field of vision of  $\alpha = 25^\circ$  (**Figure 1A**).  
79 Since snow and ice albedo is sensitive to the direction of incoming solar irradiance, all  
80 measurements were taken consecutively on the same day (between 1:00 PM and 3:00  
81 PM) under the same conditions: clear-sky, facing the sun, and with a constant  
82 measurement angle of 60° and a distance between the optical fiber and a target of 5  
83 cm.



84 To assess the influence of snow cover on the albedo impacts of snow algae, a PVC  
85 cylinder (7.6-cm radius) was placed on the surface of the algae bloom and an initial  
86 measurement of surface reflectance (i.e., albedo of the snow algae) was made. Next,  
87 subsurface snow free of apparent abiotic or biotic contaminants affecting albedo was  
88 collected near each plot using a plastic scoop. This snow was then sequentially  
89 arranged in layers of 0.5 cm each, eventually reaching a total depth of 2.0 cm (**Figure**  
90 **1B**). This depth was used as it has been identified as the point below which the  
91 physical characteristics of the snowpack pose challenges for the snow algae to grow  
92 (Cook et al., 2017).

93 Reflectance measurements were repeated in triplicate after adding each successive  
94 0.5-cm layer. The average of the reflectance of uncovered snow algae was used as a  
95 reference in each plot to assess the increase in albedo resulting from the addition of  
96 snow layers. We also measured the spectral reflectance of snow in an area devoid of  
97 evident biotic or abiotic impurities after removing the top centimeter of snow to obtain a  
98 reference for the maximum attainable sunlight reflection within the surveyed snow field  
99 at that time. We assumed that the physical characteristics of the snow were consistent  
100 across the sampled plots during the sampling period. Because carotenoids (absorbing  
101 in the 400-580 nm range) and chlorophylls (absorbing the 600-700 nm range)  
102 distinctly influence the spectral reflectance of algae-containing snow (Painter et al.,  
103 2001), these specific wavelength ranges were chosen as optimal for investigating how  
104 algae affect albedo reduction across varying snow depths.

105

#### 106 *Sample collection, pigment analysis, and cell counts*

107 Following spectral reflectance measurements for each plot, the snow within the PVC  
108 cylinder (**Figure 1B**) and a 2 cm deep core corresponding to the same surface where  
109 albedo measurements were conducted (**Figure 1C**) were both collected. The snow was  
110 placed in a sterile plastic bag and immediately transferred to the laboratory for further  
111 analysis.

112 Of the total volume of the sample (~70 mL), a 100- $\mu$ L aliquot was used to count cells,  
113 and the rest of the volume was filtered onto ashed 0.7- $\mu$ m pore size Whatman™ GF/C  
114 filters. Filters for chlorophyll analysis were extracted overnight in 90 % acetone for  
115 fluorometric analysis using the acid-correction method (EPA Method 445.0) on a  
116 Turner 10-AU Fluorometer (with Optical Kit #10-037R). Cell counts were conducted  
117 using a counting chamber (Hausser Scientific) and a light microscope (Leitz LaborLux  
118 S, with 10x objective).

119 The final concentrations of chlorophyll-a and cell density for each plot were calculated  
120 considering the final sample volumes and a constant volume of snow added on top of  
121 each plot (assuming snow density 0.2 g cm<sup>-3</sup>).

122

#### 123 *Statistical analysis*

124 We used Pearson correlations to assess relationships between biological and physical  
125 parameters of the snow. Statistically significant effects of increasing snow layer depth  
126 were determined with an ANOVA test. To better understand the relationships between  
127 algae biomass and albedo increase, linear regression analysis was performed.



128

## 129 RESULTS AND DISCUSSION

### 130 *Snow algae biomass: cell densities and chlorophyll concentrations*

131 The amount of snow algae present is a crucial determinant of their contribution to BAR  
132 (Hotaling et al., 2021). Plots with different color intensities were sampled and two  
133 approaches were used to estimate its biomass to account for the variability of algal  
134 abundance present within the studied snow patch (Cook et al. 2017). Cell densities  
135 ranged from 35,000 to 210,500 cells mL<sup>-1</sup> (**Table S1**). These biomass levels are  
136 comparable to the findings reported in the North Cascades by Healy and Khan (2023),  
137 but higher than those reported by Lutz et al., (2016) in the Arctic, suggesting large  
138 variability in cell densities in snow algae blooms. When we analysed the concentrations  
139 of chlorophyll-a, plot 6 had the highest level (4.3 x 10<sup>-6</sup> mg mL<sup>-1</sup>), nearly an order of  
140 magnitude greater than those found in plot 4 (2.7 x 10<sup>-6</sup> mg mL<sup>-1</sup>). The rest of the  
141 samples ranged in between 3.2 and 10.4 x 10<sup>-6</sup> mg mL<sup>-1</sup> (**Table S1**). Cell density and  
142 chlorophyll-a concentration were strongly correlated (R=0.93; p=0.01). This finding is  
143 relevant as chlorophyll quantity within an individual cell varies between species and  
144 can change over time as a photoacclimation mechanism (e.g., Felip and Catalan,  
145 2000). Hence, the association between pigmentation and cell abundance indicates the  
146 suitability of both methods in assessing biomass concentration within this snow algae  
147 bloom.

148

### 149 *Albedo reduction of snow algae on and beneath the surface*

150 Snow algae blooms dominate primary production on snow and ice fields (e.g., Lutz et  
151 al., 2014; Hamilton and Havig, 2017; Ganey et al., 2017; Havig and Hamilton, 2019;  
152 Khan et al., 2021). As photosynthetic organisms, snow algae require light to grow and  
153 their blooms support other microorganisms in the ecosystem (Lutz et al., 2016). Snow  
154 algae absorb light energy primarily in the ranges where their specific pigments absorb  
155 light most effectively. Across the full spectrum that we measured (350-1150 nm), we  
156 observed a significant negative correlation between algal biomass and surface albedo  
157 (-0.96; p<0.001), demonstrating a sizable BAR effect. Our albedo measurements of the  
158 snow algae also showed strong light absorption within the 400–580 nm range  
159 (carotenoids) and 600–700 nm range (chlorophylls) compared to clean snow (**Figure  
160 2**). For these absorption spectra, we observed an expected significant negative  
161 correlation between cell density and light reflectance for carotenoids (-0.91; p<0.05)  
162 and chlorophylls (-0.93; p<0.05). Similar findings were noted in relation to Chl-a  
163 concentrations (-0.86; p<0.05 and -0.90; p<0.05, respectively). These results align with  
164 prior research (e.g., Painter et al., 2001) and indicate substantial light absorption by  
165 algal cells. Collectively, these results show that the radiative influence of snow algae is  
166 greatest in the visible region, where pigments efficiently absorb light, but also occurs in  
167 the near-infrared region of the solar spectrum.

168 When we assessed how the spectral albedo of snow algae between 350-1150 nm  
169 (**Figure 2**) related to the depth of the snow added, we observed an increase in  
170 reflectance with depth of overlying snow for all plots (p<0.00). The same results were  
171 obtained for the absorption ranges of carotenoids (p<0.00) and chlorophylls (p<0.00).  
172 These findings show that the presence of a snow cover significantly influences the  
173 overall energy balance and radiative properties of snow algae blooms. However, the



174 increase in albedo for snow algae upon adding snow layers showed significant  
175 variation among plots (**Figure 3A**). On average, the overall spectral albedo (350-1150  
176 nm) increased by 59 % and 81 % with the addition of 0.5 cm and 2.0 cm of snow,  
177 respectively. Albedo for wavelengths influenced by chlorophylls showed similar values,  
178 while for carotenoid-specific wavelengths the increases in albedo were 100 % for 0.5  
179 cm and 141 % for 2.0 cm of snow. Linear regression analysis indicated a robust  
180 positive correlation between albedo increases and snow algal biomass (**Figure 3B**).  
181 This finding clarifies the relatively weak correlation between albedo and snow layers  
182 when considering all samples, implying, not unexpectedly, that the influence of snow  
183 cover on a snow algae bloom is contingent upon the algal biomass present.  
184 The albedo for the 2.0 cm experimental snow layer on the snow algae was not as high  
185 as that seen in clean snow (**Figure 3A**), showing significant differences in the studied  
186 spectral ranges ( $p < 0.00$ ). These findings indicate that the reference of clean snow  
187 exhibits greater reflectivity, revealing that energy absorption increases across all  
188 analysed wavelengths even when snow algae are covered by snow up to 2.0 cm. The  
189 efficiency of snow algae in absorbing sunlight may be crucial for sustained energy  
190 capture, enabling snow algae to thrive under low-light conditions but also to accelerate  
191 melting rates that sustain liquid water for nutrient uptake and growth. Our data indicate  
192 that this melting occurs even when snow algae occur under the snow surface and are  
193 undetectable to the naked eye.

194 Our results have implications for remote sensing of snow algae and its impacts on  
195 albedo. Efforts to use remote sensing for the identification and quantification of snow  
196 algae have increased in recent years, making it an effective tool for analysing the  
197 temporal evolution of snow algae blooms at a regional scale (e.g., Khan et al., 2021;  
198 Engstrom et al., 2022). However, sub-surface snow algae may elude detection in  
199 visible range scans and might also be undetected by direct measurements and ground-  
200 based methods typically required for precise, detailed analysis, and data validation  
201 (Gray et al., 2020). Therefore, explicit efforts to sample and quantify subsurface snow  
202 algae in these assessments should be considered. In addition, the near-infrared region  
203 seems particularly suitable as a target for its detection in cases where remote sensing  
204 proves insufficient for detection, studying snow algae impact on BAR by ground-based  
205 methods will be crucial for understanding their impact and integrating those effects into  
206 watershed melt models.

207

## 208 CONCLUSIONS

209 Current research on the remote detection of snow algae has largely been focused on  
210 using satellite images that depend on the presence of surficial blooms. Our findings  
211 indicate energy absorption across all analysed wavelengths ranges even when snow  
212 algae were covered by snow and are not visible. These findings also suggest potential  
213 metabolic activity and increased melt rates when snow algae occur under the snow  
214 surface and are undetectable to the naked eye and to remote sensing. The extent to  
215 which subsurface snow algae contribute to overall albedo reduction and snow melt has  
216 implications for alpine ecosystems, glacier health, hydrology, and water resources.  
217 Therefore, more detailed investigations are needed of the presence and abundance of  
218 sub-surface snow algae as well as their impact on BAR.

219





## 220 FIGURE CAPTIONS

221 **Figure 1.** (A) Spectral albedo assessment of a snow algae bloom using a  
222 spectroradiometer and a pistol grip optical fiber device. (B) A controlled environment for  
223 each assessment was established using a PVC cylinder, incorporating layers of snow  
224 ranging from 0.5 to 2.0 cm above the snow algae. (C) The plot defined by the PVC  
225 cylinder represents the sample surface for measuring spectral albedo. Snow collected  
226 from this area was later analysed for snow algae biomass. (D) Microscopic view of  
227 snow algae (Chlamydomonadaceae).

228 **Figure 2.** Variations in spectral albedo (350-1150 nm) observed between snow algae  
229 blooms and the various layers of added snow. Lines represent the mean of 3  
230 replicates. The spectral albedo of clean snow was measured once and serves as a  
231 reference applied to all measurements.

232 **Figure 3.** (A) Percentage increase in reflectance compared to the snow algae bloom  
233 for the various snow layers added within the specified spectral albedo ranges (350-  
234 1150 nm, 600-700, and 400-580 nm). (B) Results of linear regression analysis  
235 correlating the increase in albedo with snow layer depth and cell density.

236

## 237 AUTHOR CONTRIBUTIONS

238 PA and TH designed the study. PA conducted the field experiments and the laboratory  
239 analysis. PA wrote the initial manuscript. All authors contributed to interpreting the data  
240 and writing the final manuscript.

## 241 COMPETING INTERESTS

242 The authors declare that they have no conflict of interest.

## 243 ACKNOWLEDGEMENTS

244 We thank N. Boyer, C. Hansen, H. Klip, and K. Coates for technical assistance in the  
245 field and lab.

## 246 FINANCIAL SUPPORT

247 This work was supported by grants #2113783 (to JJE) and #2113784 (to TLH) from the  
248 National Science Foundation. SH was supported by Agriculture and Food Research  
249 Initiative Competitive Grant #2021-69012-35916 from the USDA National Institute of  
250 Food and Agriculture.

## 251 REFERENCES

252 Cook, J. M., Hodson, A. J., Gardner, A. S., Flanner, M., Tedstone, A. J., Williamson,  
253 C., Irvine-Fynn, T. D. L., Nilsson, J., Bryant, R. and Tranter, M. Quantifying bioalbedo:  
254 a new physically based model and discussion of empirical methods for characterising  
255 biological influence on ice and snow albedo. *Cryosphere*, 11, 2611–2632,  
256 <https://doi.org/10.5194/tc-11-2611-2017>, 2017.

257 Dial, R. J., Ganey, G. Q. and Skiles, S. M. What color should glacier algae be? An  
258 ecological role for red carbon in the cryosphere. *FEMS Microbiol. Ecol.*, 94, fiy007,  
259 <https://doi.org/10.1093/femsec/fiy007>, 2018.



260

261 Engstrom, C. B., Williamson, S. N., Gamon, J. A., and Quarmby, L. M. Seasonal  
262 development and radiative forcing of red snow algal blooms on two glaciers in British  
263 Columbia, Canada, summer 2020. *Remote Sens. Environ.*, 280, 113164,  
264 <https://doi.org/10.1016/j.rse.2022.113164>, 2022.

265 Felip, M., and Catalan, J. The relationship between phytoplankton biovolume and  
266 chlorophyll in a deep oligotrophic lake: decoupling in their spatial and temporal  
267 maxima. *J. Plankton Res.*, 22, 91-106, <https://doi.org/10.1093/plankt/22.1.91>, 2000.

268 Ganey, G. Q., Loso, M. G., Burgess, A. B., and Dial, R. J. The role of microbes in  
269 snowmelt and radiative forcing on an Alaskan icefield. *Nat. Geosci.*, 10, 754–759,  
270 <https://doi.org/10.1038/ngeo3027>, 2017.

271 Gray, A., Krolkowski, M., Fretwell, P., Convey, P., Peck, L. S., Mendelova, M., Smith,  
272 A. G., and Davey, M. P. Remote sensing reveals Antarctic green snow algae as  
273 important terrestrial carbon sink. *Nat. Commun.*, 11, 2527,  
274 <https://doi.org/10.1038/s41467-020-16018-w>, 2020.

275 Hamilton, T. L., and Havig, J. Primary productivity of snow algae communities on  
276 stratovolcanoes of the Pacific Northwest. *Geobiology*, 15, 280-295,  
277 <https://doi.org/10.1111/gbi.12219>, 2017.

278 Havig, J. R., and Hamilton, T. L. Snow algae drive productivity and weathering at  
279 volcanic rock-hosted glaciers. *Geochim. Cosmochim. Acta.*, 247, 220-242.  
280 <https://doi.org/10.1016/j.gca.2018.12.024>. 2019.

281 Healy, S. M., and Khan, A. L. Albedo change from snow algae blooms can contribute  
282 substantially to snow melt in the North Cascades, USA. *Commun. Earth Environ.*, 4,  
283 142, <https://doi.org/10.1038/s43247-023-00768-8>, 2023.

284 Hoham, R. W., and Remias, D. Snow and glacial algae: a review1. *J. Phycol.*, 56, 264-  
285 282, <https://doi.org/10.1111/jpy.12952>, 2020.

286 Hotaling, S., Lutz, S., Dial, R. J., Anesio, A. M., Benning, L. G., Fountain, A. G., Kelley,  
287 J. L., McCutcheon, J., Skiles, S. M., Takeuchi, N., and Hamilton, T. L. Biological albedo  
288 reduction on ice sheets, glaciers, and snowfields. *Earth. Sci. Rev.*, 220, 103728,  
289 <https://doi.org/10.1016/j.earscirev.2021.103728>, 2021.

290 Khan, A. L., Dierssen, H. M., Scambos, T. A., Höfer, J. and Cordero, R. R. Spectral  
291 characterization, radiative forcing and pigment content of coastal Antarctic snow algae:  
292 approaches to spectrally discriminate red and green communities and their impact on  
293 snowmelt. *Cryosphere*, 15, 133–148, <https://doi.org/10.5194/tc-15-133-2021>, 2021.

294 Lutz, S., Anesio, A. M., Jorge Villar, S. E., and Benning, L. G. Variations of algal  
295 communities cause darkening of a Greenland glacier. *FEMS Microbiol. Ecol.*, 89, 402–  
296 414, <https://doi.org/10.1111/1574-6941.123512014>, 2014.

297 Lutz, S., Anesio, A. M., Raiswell, R., Edwards, A., Newton, R. J., Gill, F., and Benning,  
298 L. G. The biogeography of red snow microbiomes and their role in melting arctic  
299 glaciers. *Nat. Commun.*, 7, 11968, <https://doi.org/10.1038/ncomms11968>, 2016.

300 Martin-Mikle, C. J., and Fagre, D. B. Glacier recession since the Little ice Age:  
301 Implications for water storage in a Rocky Mountain landscape. *Arct. Antarct. Alp. Res.*,  
302 51, 280-289, <https://doi.org/10.1080/15230430.2019.1634443>, 2019.

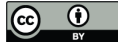

303 Onuma, Y., Takeuchi, N., Tanaka, S., Nagatsuka, N., Niwano, M., and Aoki, T.:  
304 Physically based model of the contribution of red snow algal cells to temporal changes  
305 in albedo in northwest Greenland, *Cryosphere*, 14, 2087–2101,  
306 <https://doi.org/10.5194/tc-14-2087-2020>, 2020.

307 Painter, T. H., Duval, B., Thomas, W. H., Mendez, M., Heintzelman, S., and Dozier, J.  
308 Detection and quantification of snow algae with an airborne imaging spectrometer.  
309 *Appl. Environ. Microbiol.*, 67, 5267–5272, [https://doi.org/10.1128/AEM.67.11.5267-](https://doi.org/10.1128/AEM.67.11.5267-5272.2001)  
310 [5272.2001](https://doi.org/10.1128/AEM.67.11.5267-5272.2001), 2001.

311 Skiles, S. M., Flanner, M., Cook, J. M., Dumont, M., and Painter, T. H. Radiative forcing  
312 by light-absorbing particles in snow. *Nat. Clim. Change.*, 8, 964-971,  
313 <https://doi.org/10.1038/s41558-018-0296-5>, 2018.

314

315

316

317

318

319

320

321

322

323

324

325

326

327

328

329

330

331

332

333

334

335

336

337

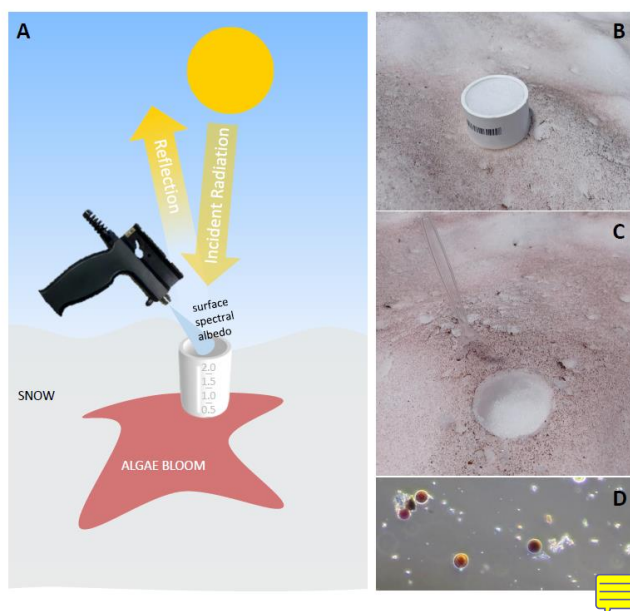

338

339 Figure 1.

340

341

342

343

344

345

346

347

348

349

350

351

352

353

354

355

356

357

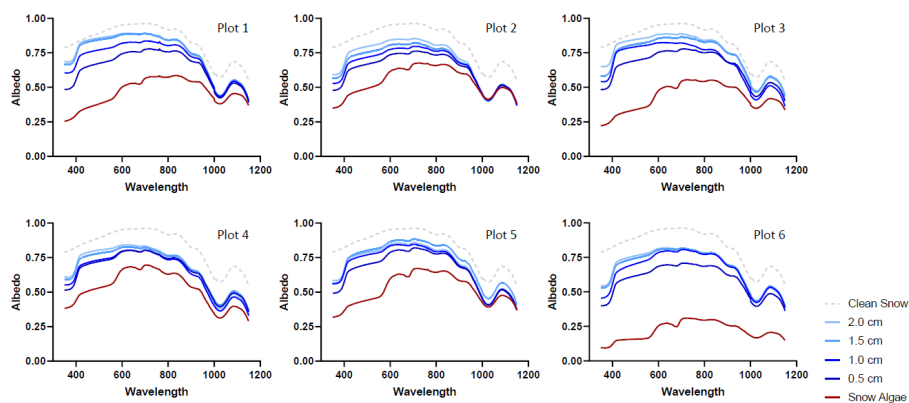

358

359 Figure 2.

360

361

362

363

364

365

366

367

368

369

370

371

372

373

374

375

376

377

378

379

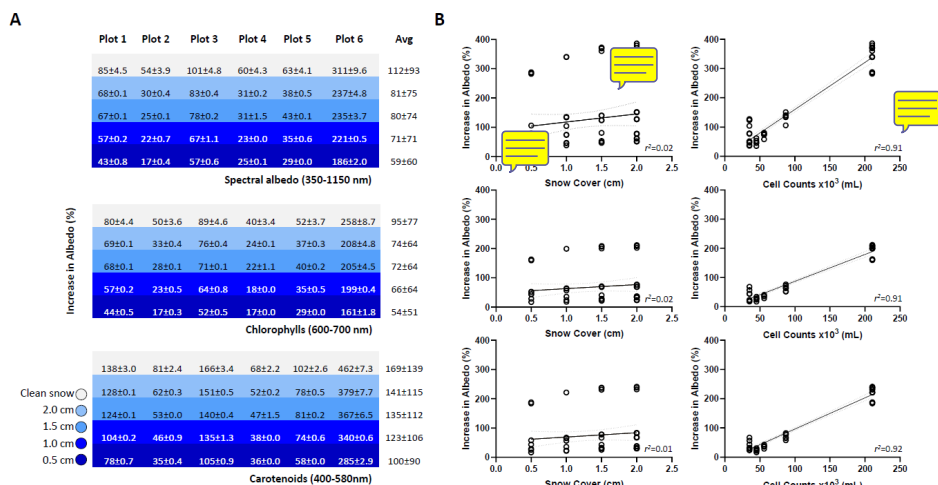

380

381 Figure 3.

382

383

384

385

386

387

388

389

390

391

392

393

394

395

396

397

398

399

400

401
